# Supplementary material
Source: PubMed Central journal article supplement (PMC1891218)

**a**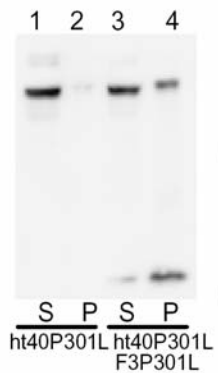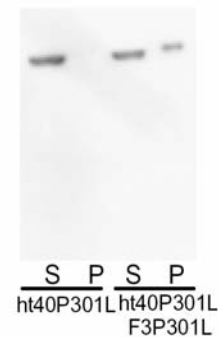**b**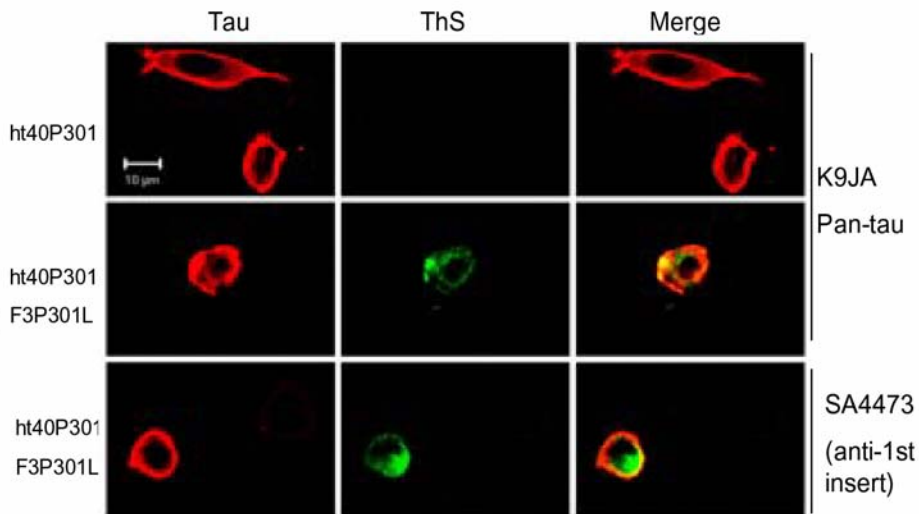

Supplement: pnas_0703676104_1.pdf [file pnas_0703676104_1.pdf]

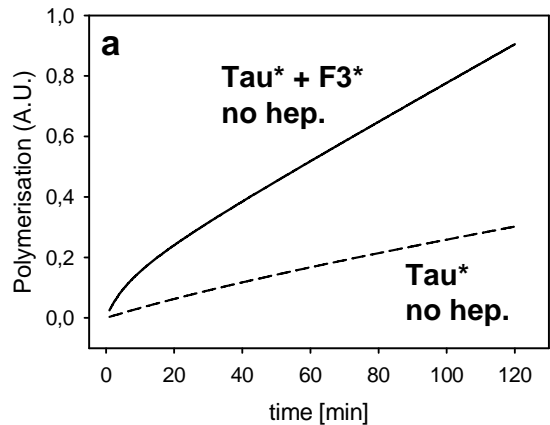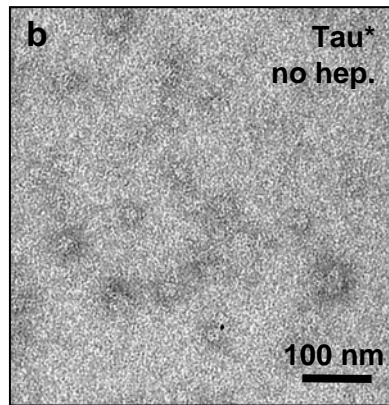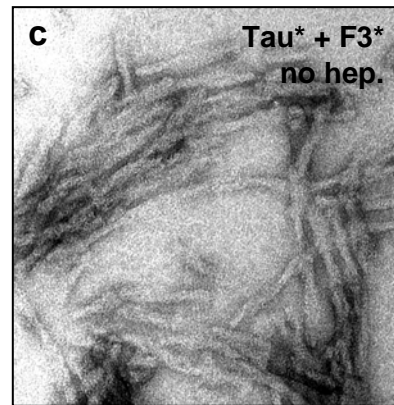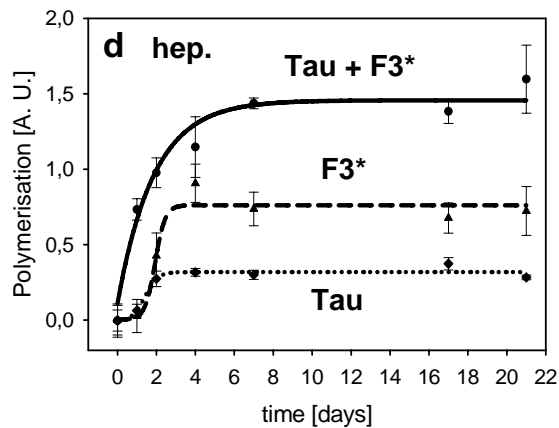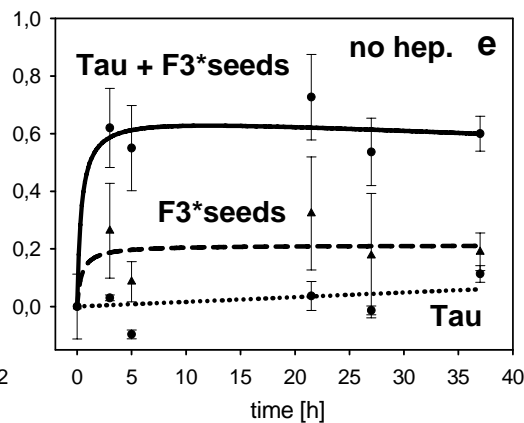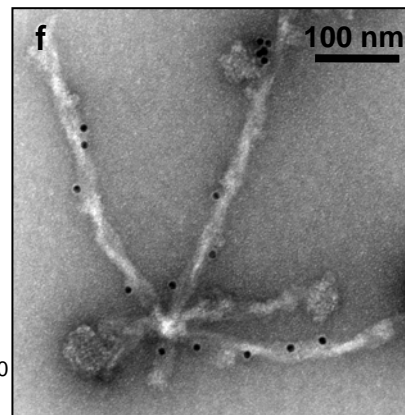

Supplement: pnas_0703676104_2.pdf [file pnas_0703676104_2.pdf]

**a**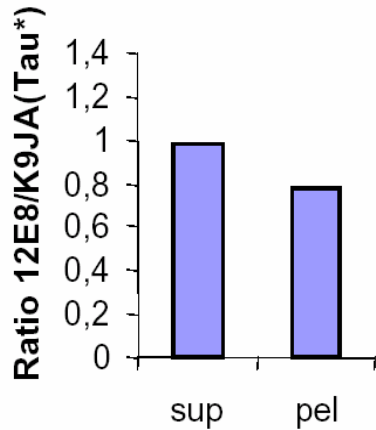**b**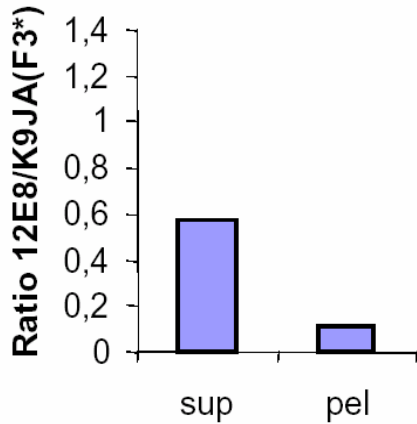**c**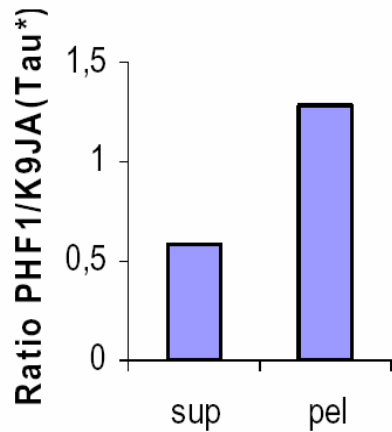

Supplement: pnas_0703676104_3.pdf [file pnas_0703676104_3.pdf]
